# Supplementary material for: Modeling and Analysis of Rice Root Water Uptake under the Dual Stresses of Drought and Waterlogging
Source: MDPI journal article supplement (doi:10.3390/agriculture14040532), 2024-03-27
Supplement: s1 [file s1]

Archive with 1 entries (1 files):
- agriculture-2797166-supplementary.pdf
