# Supplementary material for: Modeling and Analysis of Rice Root Water Uptake under the Dual Stresses of Drought and Waterlogging
Source: MDPI journal article supplement (doi:10.3390/agriculture14040532), 2024-03-27
Supplement: s1 [file s1 › agriculture-2797166-supplementary.pdf]

## Supplementary Material

### 2.3.2 Calculation of the actual evaporation transpiration $ET'_a$

Combining the actual growth of rice (plant height, leaf area, etc.) and the actual meteorological data of the experimental station, the modified Penman Monteith (PM) formula [1] is used to calculate the actual evaporation transpiration  $ET'_a$  of rice. the equations are as follows:

$$ET'_a = \frac{\Delta(R_n - G) + \rho_a c_p (e_s - e_a)/r_a}{\left[ \Delta + \gamma \left( 1 + \frac{r_s}{r_a} \right) \right] \lambda} \quad (S-1)$$

Where,  $ET'_a$  are the actual evaporation transpiration of rice, mm d<sup>-1</sup>;

$\Delta$  are the slope of the air pressure curve of saturated water, kPa °C<sup>-1</sup>;

$R_n$  are the net radiation from the crop surface, MJ m<sup>-2</sup> d<sup>-1</sup>;

$G$  are the soil heat flux, when the day is the time step, can be ignored, MJ m<sup>-2</sup> d<sup>-1</sup>;

$\gamma$  are the dry wet table constant, kPa °C<sup>-1</sup>;

$e_s - e_a$  are the difference between saturated vapor pressure and actual vapor pressure, kPa;

$\rho_a$  are the average air density, kg m<sup>-3</sup>;

$c_p$  are the specific heat of air, 1.013 × 10<sup>-3</sup>, MJ kg<sup>-1</sup>°C<sup>-1</sup>;

$r_a$  are the aerodynamic impedance, s m<sup>-1</sup>;

$r_s$  are the surface impedance, s m<sup>-1</sup>;

$\lambda$  are the enthalpy of vaporization, MJ kg<sup>-1</sup>.

The calculation process is as follows:

**Step (1)  $\Delta$**

$$\Delta = \frac{4098 \times [0.6108 \times \exp(\frac{17.27T}{T + 237.3})]}{(T + 237.3)^2} \quad (S-2)$$

$\Delta$  are the slope of the saturation water pressure at air temperature, kPa °C<sup>-1</sup>. Note: In this paper, daily mean temperature is selected, °C.

**Step (2)  $\gamma$**

$$\gamma = \frac{C_p P}{\varepsilon \lambda} = \frac{0.00163P}{\lambda} \quad (\text{S-3})$$

$$\lambda = 2.501 - 2.361 \times 10^{-3} T \quad (\text{S-4})$$

Where,  $C_p$  are air pressure specific heat,  $1.013 \times 10^{-3} \text{ MJ kg}^{-1} \text{ } ^\circ\text{C}^{-1}$ ;  $\varepsilon$  are the specific gravity of water vapor and dry air molecules, 0.622;  $\lambda$  are the latent heat for vaporization,  $\text{MJ kg}^{-1}$ ;  $P$  are atmospheric pressure, kPa, the measured values of photosynthetic apparatus were used in this study.

**Step (3)  $\rho_a$**

$$\rho_a = 1.293 \cdot \left( \frac{P}{101.3} \right) \cdot \frac{273.16}{273.16 + T} \quad (\text{S-5})$$

**Step (4)  $R_n$**

$$R_n = R_{ns} - R_{nl} \quad (\text{S-6})$$

$$R_{ns} = (1 - \alpha) R_s \quad (\text{S-7})$$

$$R_{nl} = \sigma \left[ \frac{T_{max,K}^4 + T_{min,K}^4}{2} \right] \left( 0.34 - 0.14 \sqrt{e_a} \right) \left( 1.35 \frac{R_s}{R_{so}} - 0.35 \right) \quad (\text{S-8})$$

$$R_s = \left( a_s + b_s \frac{n}{N} \right) R_a \quad (\text{S-9})$$

$$N = \frac{24}{\pi} w_s \quad (\text{S-10})$$

$$w_s = \arccos \left[ -\tan(\varphi) \tan(\delta) \right] \quad (\text{S-11})$$

$$\delta = 0.408 \sin \left( \frac{2\pi}{365} J - 1.39 \right) \quad (\text{S-12})$$

$$R_a = \frac{24(60)}{\pi} G_{sc} d_r \left[ w_s \sin(\varphi) \sin(\delta) + \cos(\varphi) \cos(\delta) \sin(w_s) \right] \quad (\text{S-13})$$

$$d_r = 1 + 0.033 \cos \left( \frac{2\pi}{365} J \right) \quad (\text{S-14})$$

$$T_{max,K} = T_{max} + 273.16 \quad (\text{S-15})$$

$$T_{min,K} = T_{min} + 273.16 \quad (\text{S-16})$$

$$e_s = \frac{e(T_{max}) + e(T_{min})}{2} \quad (S-17)$$

$$e(T) = 0.6108 \times \exp\left(\frac{17.27T}{T + 237.3}\right) \quad (S-18)$$

$$R_{so} = (a_s + b_s) R_a \quad (S-19)$$

Where,  $R_{ns}$  are the net short-wave radiation,  $\text{MJ m}^{-2} \text{d}^{-1}$ ;  $R_{nl}$  are the net long wave radiation,  $\text{MJ m}^{-2} \text{d}^{-1}$ ;  $\sigma$  are the Stephen-Ludwig Boltzmann constant,  $4.903 \times 10^{-9} \text{ MK K}^{-4} \text{ m}^{-2} \text{d}^{-1}$ ;  $\alpha$  are the reflectivity. According to Yang Changming et al. [2], 0.175 for jointing heading stage and 0.168 for filling maturity stage were selected for reflectivity;  $T_{max,K}$  and  $T_{min,K}$  are the highest and lowest absolute temperatures, respectively, K;  $T_{max}$  and  $T_{min}$  are the lowest and highest temperatures respectively,  $^{\circ}\text{C}$ ,  $e_a$  are actual water vapor pressure, kPa;  $R_s$  are the solar radiation,  $\text{MJ m}^{-2} \text{d}^{-1}$ ;  $R_a$  are radiation outside the earth,  $\text{MJ m}^{-2} \text{d}^{-1}$ ;  $a_s$ 、 $b_s$  are the regression coefficient,  $a_s = 0.25$ 、 $b_s = 0.50$ ;  $n$  and  $N$  are the actual sunshine hours and the theoretical possible sunshine hours, h;  $d_r$  are the average distance between the earth and the Sun;  $J$  are daily order, the values range from 1 to 365 or 366, and the order of January 1st is 1;  $\varphi$  are latitude, rad;  $w_s$  are the angle of sunrise, rad;  $\delta$  is the magnetic declination of the sun rad;  $G_{sc}$  is the solar constant,  $0.0820 \text{ MJ m}^{-2} \text{min}^{-1}$ .

**Step (5)  $r_a$**

$$r_a = -\frac{\ln\left[\frac{z_m - d}{z_{om}}\right] \ln\left[\frac{z_h - d}{z_{oh}}\right]}{k^2 u_z} \quad (S-20)$$

$$d = 2/3H \quad (S-21)$$

$$z_{om} = 0.123H \quad (S-22)$$

$$z_{oh} = 0.1z_{om} \quad (S-23)$$

$$r_s = \frac{r_l}{0.5LAI} \quad (S-24)$$

Where,  $H$  are the plant height, m (see table S-1), at waterlogging stress stage, the plant height is the height above the water surface;  $z_m$  are wind speed measurement, this study was 2 m;  $z_{om}$  are the length of roughness that controls momentum transfer, m;  $z_h$  is the measure height for humidity, this study was 1.5 m;  $z_{oh}$  is the coarse length that controls the transfer of heat and water vapor, m;  $u_z$  are the measured wind speed,  $\text{m s}^{-1}$ ;  $k$  is the von Kaman constant, 0.41;  $d$  is the zero plane displacement height, m;  $r_l$  are the stomatal resistance that fully irradiates the blade,  $\text{s m}^{-1}$ ;  $LAI$  are leaf area index (see table S -2) , at stage waterlogging ,  $LAI$  are the leaf area index above the water surface.

**Step (6)  $T'_a$**

$ET'_a$  actually includes crop leaf transpiration strength  $T'_a$  and tree evaporation  $E_s$ , where es can be calculated by the following as Ritchie [3].

$$T'_a = ET'_a - E_s \quad (\text{S-25})$$

$$E_s = \begin{cases} ET'_a \times (1 - 0.43 \times LAI) & LAI \leq 1 \\ ET'_a \times \exp(-0.4 \times LAI)/1.1 & LAI > 1 \end{cases} \quad (\text{S-26})$$

Where  $E_s$  is the evaporation between plants,  $\text{mm d}^{-1}$ , and  $\text{mmd-1}$ ;  $LAI$  is the leaf area index of rice.

Figure S1

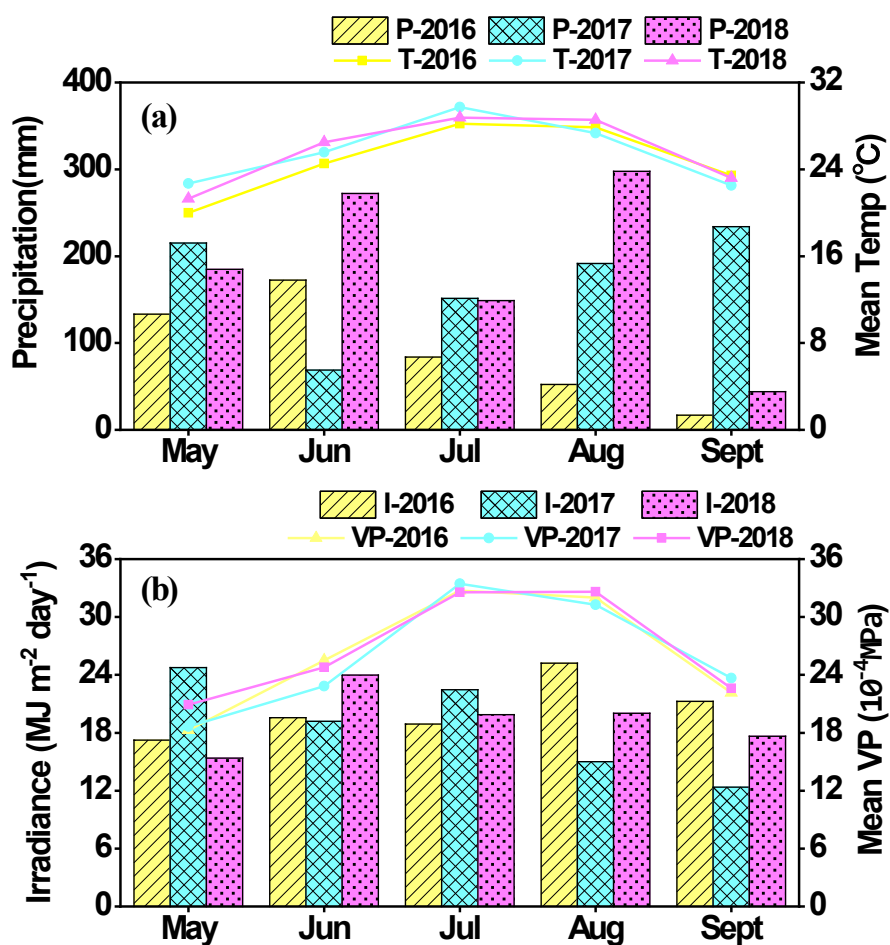

Figure S1. (a) Monthly precipitation (P) and mean air temperature (T), (b) irradiance (I) and mean vapor pressure (VP) at the Xinmaqiao Comprehensive Experiment Station of Irrigation and Drainage, Bengbu, China (117°21'34"E, 33°08'56"N) during the rice growing season (May to September) in 2016–2018.

Table S1 The fitting formula of rice plant height (H) with time in 2016–2018 under different treatments.

| 2016           | The fitting formula     | R <sup>2</sup> | 2017           | The fitting formula     | R <sup>2</sup> | 2018           | The fitting formula     | R <sup>2</sup> |
|----------------|-------------------------|----------------|----------------|-------------------------|----------------|----------------|-------------------------|----------------|
| Normal Control | $H=58.193\ln(t)-108.81$ | 0.9686         | Normal Control | $H=57.655\ln(t)-114.01$ | 0.9434         | Normal Control | $H=56.199\ln(t)-111.70$ | 0.9915         |
| RSDW1          | $H=46.065\ln(t)-71.44$  | 0.9671         | RSDW4          | $H=54.012\ln(t)-99.02$  | 0.9736         | RSDW7          | $H=58.326\ln(t)-112.26$ | 0.9313         |
| SD1            | $H=38.231\ln(t)-48.22$  | 0.8729         | SD4            | $H=58.870\ln(t)-117.76$ | 0.9472         | SD7            | $H=48.200\ln(t)-76.266$ | 0.9021         |
| SW1            | $H=59.206\ln(t)-114.78$ | 0.9843         | SW4            | $H=64.087\ln(t)-136.03$ | 0.9191         | sw7            | $H=56.894\ln(t)-104.01$ | 0.9716         |
| RSDW2          | $H=37.477\ln(t)-44.99$  | 0.9398         | RSDW5          | $H=44.418\ln(t)-69.10$  | 0.9423         | RSDW8          | $H=50.825\ln(t)-83.091$ | 0.9218         |
| SD2            | $H=38.746\ln(t)-47.46$  | 0.9336         | SD5            | $H=59.419\ln(t)-119.99$ | 0.9827         | SD8            | $H=51.391\ln(t)-91.456$ | 0.9297         |
| SW2            | $H=55.160\ln(t)-99.29$  | 0.9689         | SW5            | $H=63.454\ln(t)-134.03$ | 0.9262         | SW8            | $H=59.171\ln(t)-114.67$ | 0.9835         |
| RSDW3          | $H=31.762\ln(t)-23.33$  | 0.9154         | RSDW 6         | $H=57.055\ln(t)-113.47$ | 0.9850         | RSDW9          | $H=53.337\ln(t)-93.134$ | 0.9541         |
| SD3            | $H=31.252\ln(t)-20.83$  | 0.8955         | SD6            | $H=55.095\ln(t)-103.44$ | 0.9364         | SD9            | $H=39.833\ln(t)-51.42$  | 0.8822         |
| SW3            | $H=56.384\ln(t)-104.48$ | 0.9570         | SW6            | $H=65.356\ln(t)-140.47$ | 0.9160         | SW9            | $H=60.053\ln(t)-110.43$ | 0.9699         |

Note: H is the plant height of rice cm; t are the days after transplantation, d. RSDW represents the rapid shift between drought and waterlogging treatment groups, SD for the single drought treatment group, SW for the single waterlogging treatment group, and Control for the normal moisture treatment group.

Table S2 The fitting formula of rice leaf area index (LAI) with time in 2016–2018 under different treatments.

| 2016           | The LAI fitting formula               | R2     | 2017           | The LAI fitting formula               | R2     | 2018           | The LAI fitting formula               | R2     |
|----------------|---------------------------------------|--------|----------------|---------------------------------------|--------|----------------|---------------------------------------|--------|
| Normal Control | $LAI = -0.0037t^2 + 0.4187t - 6.0076$ | 0.9828 | Normal Control | $LAI = -0.0028t^2 + 0.3285t - 3.8217$ | 0.8948 | Normal Control | $LAI = -0.0026t^2 + 0.3102t - 3.4305$ | 0.9599 |
| RSDW1          | $LAI = -0.0041t^2 + 0.4409t - 6.7326$ | 0.7212 | RSDW4          | $LAI = -0.0027t^2 + 0.3304t - 4.2093$ | 0.9044 | RSDW7          | $LAI = -0.0036t^2 + 0.4181t - 5.9090$ | 0.7821 |
| SD1            | $LAI = -0.0030t^2 + 0.3444t - 4.7470$ | 0.7810 | SD4            | $LAI = -0.0027t^2 + 0.3270t - 4.0467$ | 0.9313 | SD7            | $LAI = -0.0020t^2 + 0.2584t - 2.6140$ | 0.9277 |
| SW1            | $LAI = -0.0036t^2 + 0.3739t - 4.6400$ | 0.8274 | SW4            | $LAI = -0.0033t^2 + 0.3916t - 5.4764$ | 0.9856 | sw7            | $LAI = -0.0036t^2 + 0.4036t - 5.4012$ | 0.9793 |
| RSDW2          | $LAI = -0.0024t^2 + 0.2973t - 3.8875$ | 0.8038 | RSDW5          | $LAI = -0.0025t^2 + 0.2987t - 3.4676$ | 0.9342 | RSDW8          | $LAI = -0.0024t^2 + 0.3131t - 4.1129$ | 0.7411 |
| SD2            | $LAI = -0.0023t^2 + 0.2740t - 3.1797$ | 0.8577 | SD5            | $LAI = -0.0031t^2 + 0.3557t - 4.7202$ | 0.9294 | SD8            | $LAI = -0.0031t^2 + 0.3667t - 5.0485$ | 0.7756 |
| SW2            | $LAI = -0.0024t^2 + 0.3048t - 3.7047$ | 0.9711 | SW5            | $LAI = -0.0033t^2 + 0.4064t - 6.0147$ | 0.9527 | SW8            | $LAI = -0.0027t^2 + 0.3191t - 3.6580$ | 0.9269 |
| RSDW3          | $LAI = -0.0022t^2 + 0.2637t - 2.9038$ | 0.7818 | RSDW 6         | $LAI = -0.0025t^2 + 0.3018t - 3.6761$ | 0.8536 | RSDW9          | $LAI = -0.0017t^2 + 0.2266t - 2.3169$ | 0.8351 |
| SD3            | $LAI = -0.0028t^2 + 0.3189t - 4.1789$ | 0.8352 | SD6            | $LAI = -0.0028t^2 + 0.3259t - 4.0905$ | 0.9186 | SD9            | $LAI = -0.0023t^2 + 0.2963t - 3.8341$ | 0.8164 |
| SW3            | $LAI = -0.0020t^2 + 0.2697t - 2.9464$ | 0.9611 | SW6            | $LAI = -0.0041t^2 + 0.4675t - 7.0892$ | 0.9603 | SW9            | $LAI = -0.0023t^2 + 0.2977t - 3.4052$ | 0.9887 |

Note: LAI is the leaf area index of rice cm; t are the days after transplantation, d. RSDW represents the rapid shift between drought and waterlogging treatment groups, SD for the single drought treatment group, SW for the single waterlogging treatment group, and Control for the normal moisture treatment group.

## References

- [1] Allan R G , Pereira L S , Raes D ,et al.Crop evapotranspiration-Guidelines for computing crop water requirements-FAO Irrigation and drainage paper 56[J].Fao, 1998.DOI:doi:<http://dx.doi.org/>.
- [2] Changming Y , Linzhang Y , Chao-Ling W ,et al.Canopy spectral characteristics of different rice varieties[J].Chinese Journal of Applied Ecology, 2002.
- [3] Ritches J T. Specification of the ideal model for predicting crop yields. In: R.C. Muchow and J.A. Bellamy (Eds). Climatic risk in crop production: model and management for semiarid tropics subtropics. CAB international, Wallinford [J]. 1991.
